# Supplementary material for: Regulation of NMDA receptor trafficking by amyloid-β
Source: Springer Nature journal article supplement (doi:10.1038/nn1503), 2005-07-17
Supplement: 41593_2005_BFnn1503_MOESM1_ESM.pdf [file 41593_2005_BFnn1503_MOESM1_ESM.pdf]

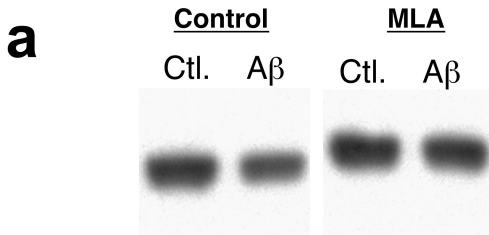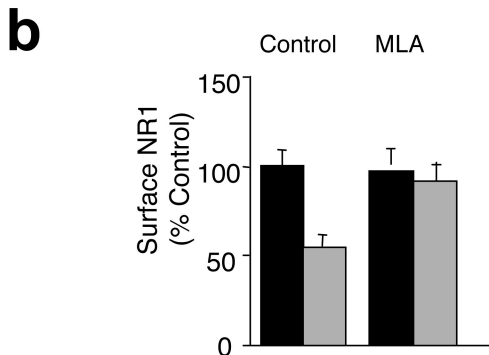

**Supplemental Fig. 1** (a) The nicotinic antagonist MLA reduced internalization of NMDA receptors. (b) Quantification revealed that in MLA, surface NR1 was expressed at  $90 \pm 6\%$  of control. In amyloid- $\beta$  + MLA, NR1 was  $87 \pm 8\%$  of control,  $n=3$ .
